# Supplementary material for: Miniaturisation and simplification of solid-state proton activity sensors for non-aqueous media and ionic liquids
Source: Royal Society of Chemistry journal article supplement (doi:10.1039/c4an01556h), 2014-11-24
Supplement: c4an01556h1.pdf [file c4an01556h1.pdf]

## Electronic Supplementary Information for

### Miniaturisation and simplification of solid-state proton activity sensor for non-aqueous media and ionic liquids

Orawan Winther-Jensen\*, Jessie L. Hamilton, Chun Ng, Bartłomiej Kolodziejczyk and Bjorn Winther-Jensen

#### Schematic for $\Delta E_{\text{half}}$ measuring principle

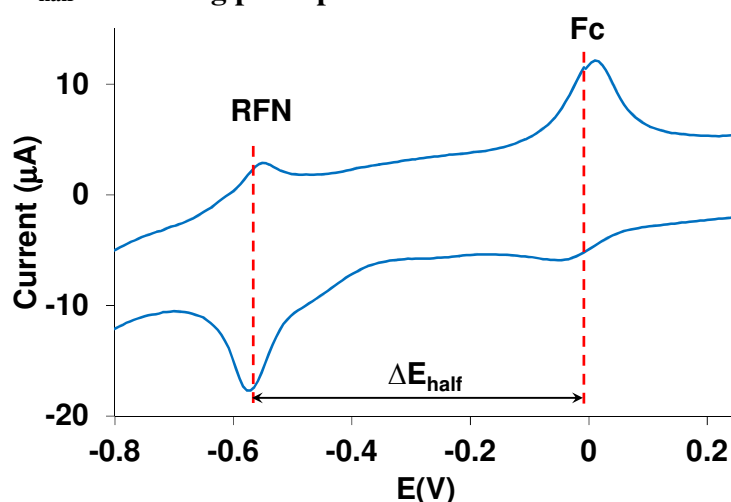

**Figure S1** A sample CV showing the measuring principle of PEDOT:RFN-Fc electrodes.  $E_{\text{ox}}$  and  $E_{\text{red}}$  of RFN and Fc give  $E_{\text{half}}$  of each redox couple.  $\Delta E_{\text{half}}$  defines the potential between  $E_{\text{half}}$  of the Fc reference redox couple and  $E_{\text{half}}$  of the RFN redox couple.  $\Delta E_{\text{half}}$  will vary with the change in pH as the  $E_{\text{half}}$  of RFN change according to the pH. Consequently, a calibration curve from  $\Delta E_{\text{half}}$  and pH changes can be constructed.

#### Full Raman spectra and assignments

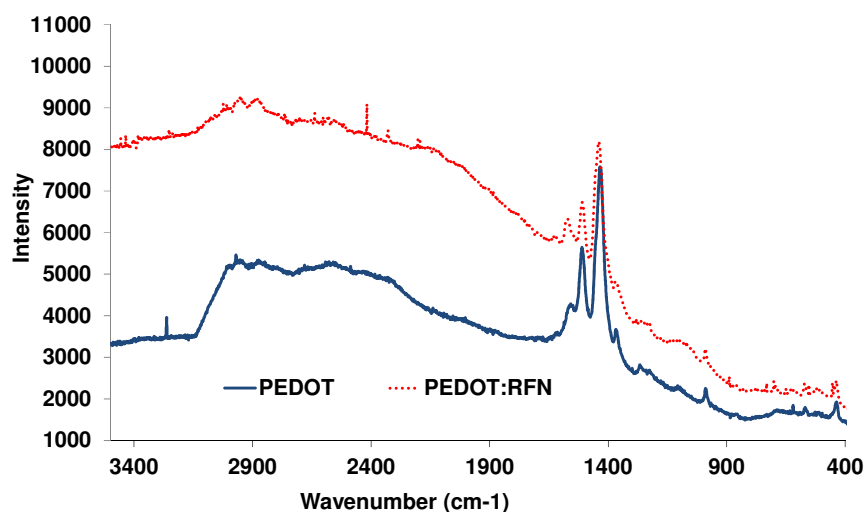

**Figure S2** Raman spectra of PEDOT and PEDOT:RFN.

The intense peak at around  $1433\text{ cm}^{-1}$  (for PEDOT) and  $1444\text{ cm}^{-1}$  (for PEDOT:RFN) is attributed to the symmetric  $C_{\alpha}=C_{\beta}$  stretching [1]. The bands at around  $1511\text{ cm}^{-1}$ ,  $1368\text{ cm}^{-1}$ ,  $1267\text{ cm}^{-1}$  are assigned to the antisymmetric  $C_{\alpha}=C_{\beta}$  stretching,  $C_{\beta}-C_{\beta}$  stretching and inter-ring  $C_{\alpha}-C_{\alpha'}$  stretching respectively [1]. Deformation of the oxyethylene ring appeared as the peak at  $990\text{ cm}^{-1}$  [1].

### FTIR assignments for RFN and Fc

Main characteristic peaks of RFN have some intense characteristic peaks which are  $1732$  (assigned for  $C=O$  stretching),  $1646$  (assigned for  $C=C$  stretching),  $1580$  and  $1540\text{ cm}^{-1}$  (assigned for  $C=N$  and  $C=C$  stretching) [2], and  $1072$  and  $1014\text{ cm}^{-1}$  which could be due to  $C-O$  stretching from alcohol groups. Fc peaks  $1104$ ,  $999$ , and  $813\text{ cm}^{-1}$  have been assigned as  $C-Fe$  stretching,  $C-H$  out of plane bending (ring breathing),  $C-H$  ring metal stretching, respectively [3].

### C-paper and PEDOT coated C-paper characterisation

#### C-paper

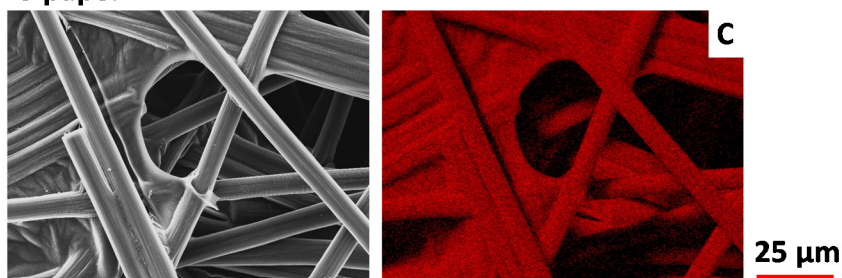

#### PEDOT coated C-paper

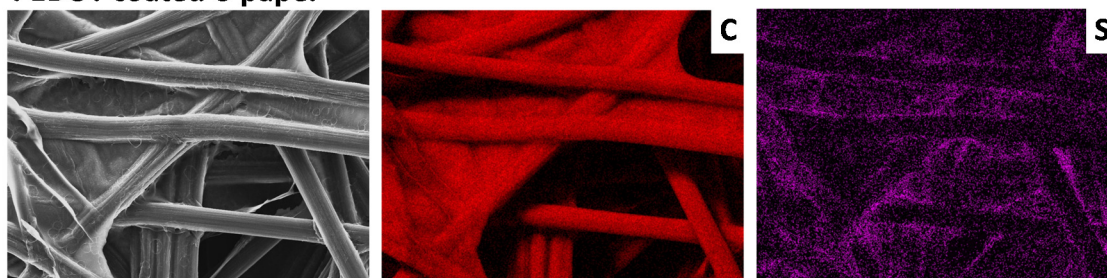

**Figure S3** SEM and EDX images of C-paper and PEDOT coated C-paper at 15 kV. For PEDOT coated C-paper, PEDOT coating is not blocking the C-paper pores and sulfur from PEDOT appeared as a thin layer coating on the C fibres (bottom right image).

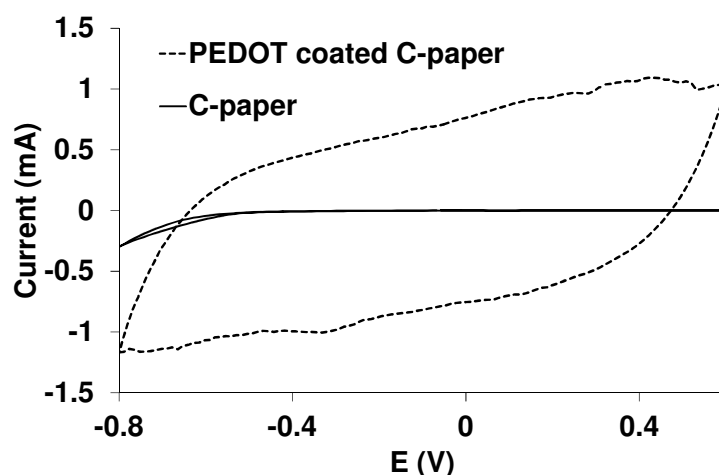

**Figure S3** CVs of PEDOT coated C-paper (dotted trace) and C-paper (solid trace) in 0.1 M PB pH 5 at 10 mV/s. Ag/AgCl (3 M NaCl) and large Ti mesh ( $\sim 2.5 \times 4 \text{ cm}^2$ ) was used as reference and counter electrodes, respectively.

### Stability of RFN and Fc peaks over repetitive CV scans

**Table S1** % RSD of peak current upon three repetitive CV scans of PEDOT:RFN-Fc in various ILs

| ILs                                | RFN             |                  | Fc              |                  |
|------------------------------------|-----------------|------------------|-----------------|------------------|
|                                    | E <sub>ox</sub> | E <sub>red</sub> | E <sub>ox</sub> | E <sub>red</sub> |
| P <sub>1,3</sub> NTf <sub>2</sub>  | 22              | 2                | 11              | 23               |
| EMIm(CN) <sub>4</sub> B            | 16              | 10               | 5               | 8                |
| EMImSCN                            | 10              | 14               | 17              | 16               |
| 67% P <sub>1,4,4,4</sub> TOS in PC | 4               | 31               | 54              | 43               |
| EAN                                | 19              | 9                | 7               | 15               |

### Reference

- [1] S. Garreau, G. Louarn, J.P. Buisson, G. Froyer, S. Lefrant, *Macromolecules*, 32 (1999) 6807-6812.
- [2] S. Ye, F. Wei, *Analyst*, 136 (2011) 2489-2494.
- [3] J.O. Enlow, H. Jiang, J.T. Grant, K. Eyink, W. Su, T.J. Bunning, *Polymer*, 49 (2008) 4042-4045.
